# Supplementary material
Source: MDPI journal article supplement (https://www.mdpi.com/2504-3129/3/3/26)
Supplement: s1 [file s1]

## Supplementary Material

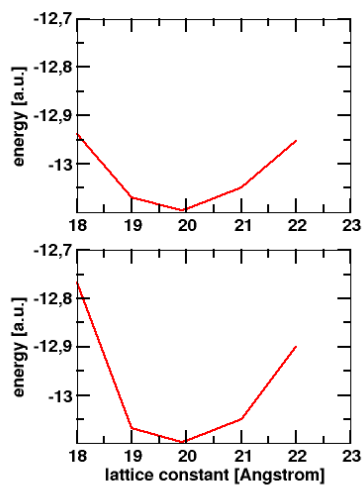

Figure S1: Cell constant depending on the plane-wave cutoff for the  $3 \times 3 \times 3$  supercell. Upper graph: 50 Rydberg, lower graph: 70 Rydberg. Both graphs agree well with the experimental value of 19.90 a.u. ( $3 \times 3.51 \text{ \AA}$ , leading to a density of  $0.534 \text{ g/cm}^3$ , <https://en.wikipedia.org/wiki/Lithium>, last accessed 16/06/2022).

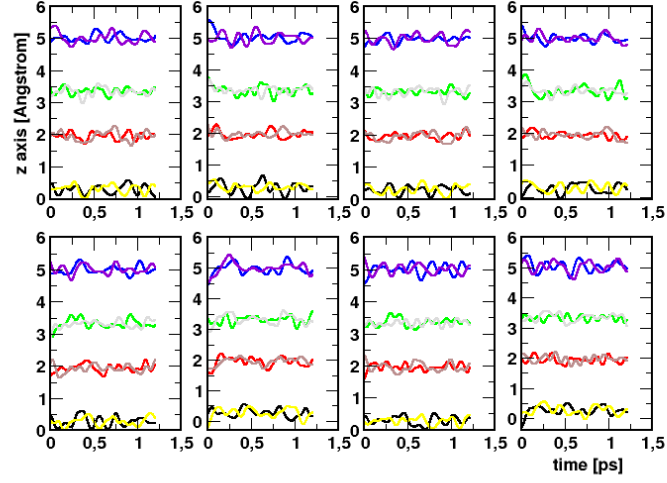

Figure S2: z-Axis of all the 64 lithium atoms in simulation **1**, eight atoms per plot (100 K). The structure is stable.

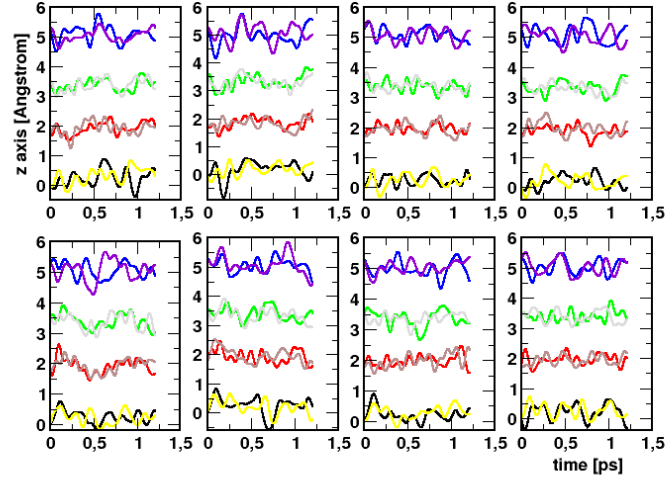

Figure S3: z-Axis of all the 64 lithium atoms in simulation **1**, eight atoms per plot (300 K). The structure is stable.

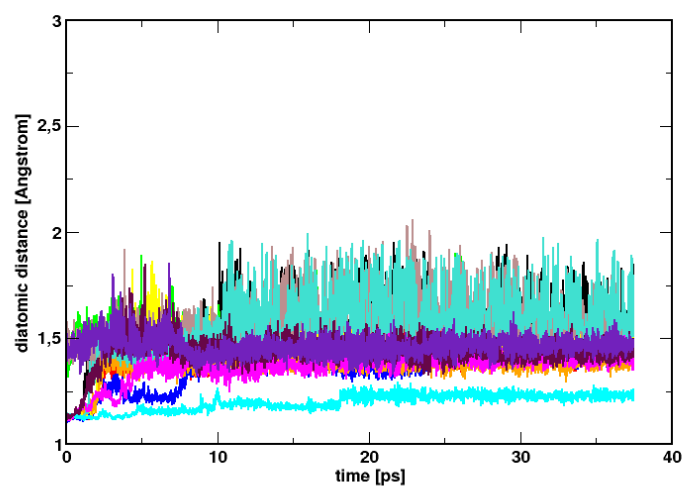

Figure S4: Diatomic distances of all nitrogen molecules in simulation **2** (300 K). The nitrogen molecules are integrated in the lithium slab which leads to an elongation of the nitrogen-nitrogen bond, but in this case to no bond breaking.

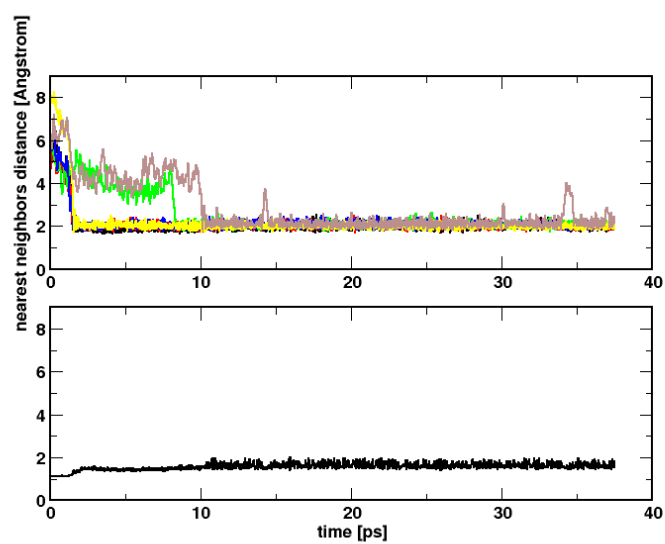

Figure S5: Simulation 2: Distances of the nearest neighbors, first nitrogen atom. Upper plot: lithium, lower plot: nitrogen. The nitrogen-nitrogen bond is weakened as the nitrogen molecule is integrated in the surface. In the end, it is surrounded by six lithium atoms.

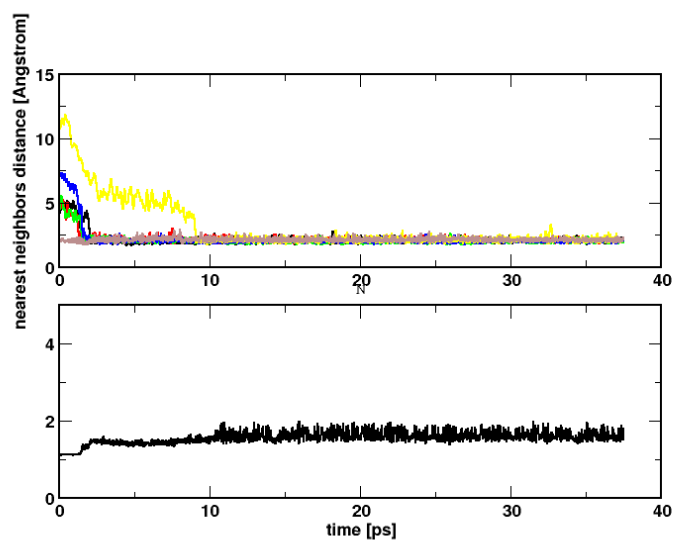

Figure S6: Simulation 2: Distances of the nearest neighbors, second nitrogen atom. Upper plot: lithium, lower plot: nitrogen. The nitrogen-nitrogen bond is weakened as the nitrogen molecule is integrated in the surface. In the end, it is surrounded by six lithium atoms.

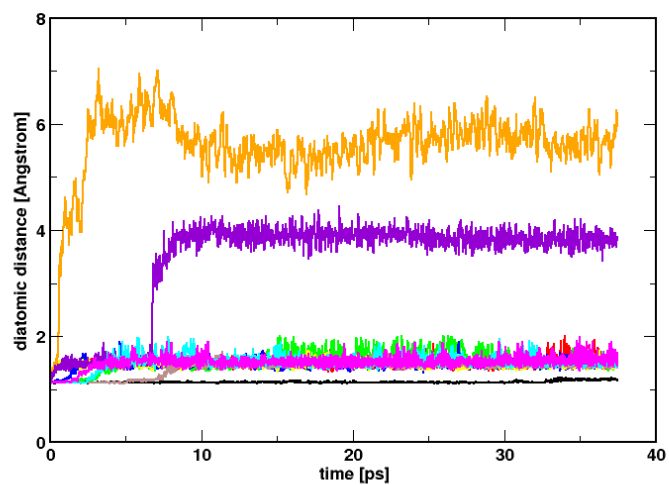

Figure S7: Diatomic distances of all nitrogen molecules in simulation **3** (300 K). Most nitrogen molecules are integrated in the lithium slab which leads to an elongation of the nitrogen-nitrogen bond. A single nitrogen molecule (black) remains unbound. Two nitrogen molecules (orange and lilac) dissociate.

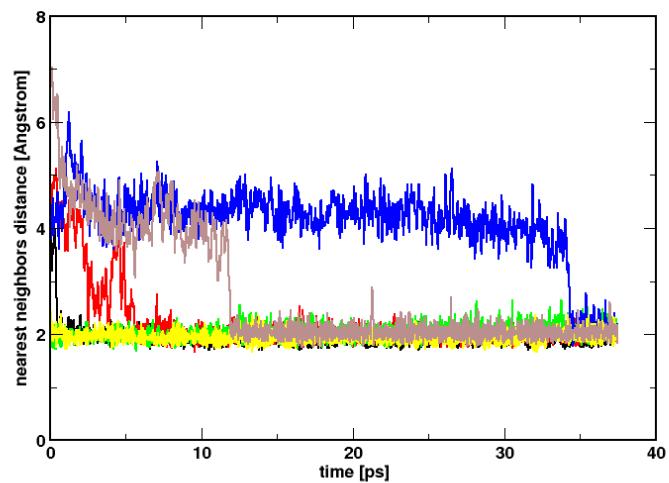

Figure S8: Simulation **3**: Distances of the nearest neighbors, first nitrogen atom. In the end, the nitrogen atom is surrounded by six lithium atoms.

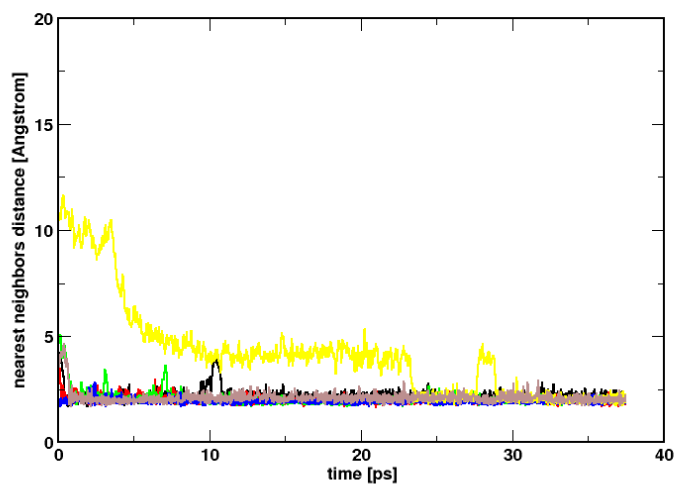

Figure S9: Simulation **3**: Distances of the nearest neighbors, second nitrogen atom. In the end, the nitrogen atom is surrounded by six lithium atoms.

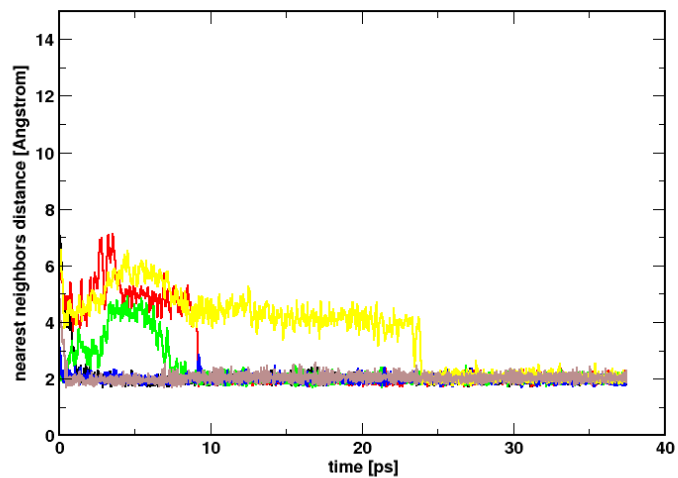

Figure S10: Simulation **3**: Distances of the nearest neighbors, third nitrogen atom. In the end, the nitrogen atom is surrounded by six lithium atoms.

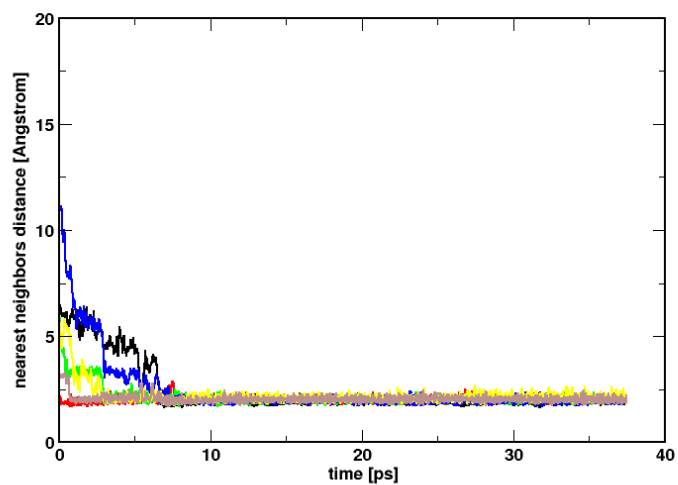

Figure S11: Simulation **3**: Distances of the nearest neighbors, fourth nitrogen atom. In the end, the nitrogen atom is surrounded by six lithium atoms.



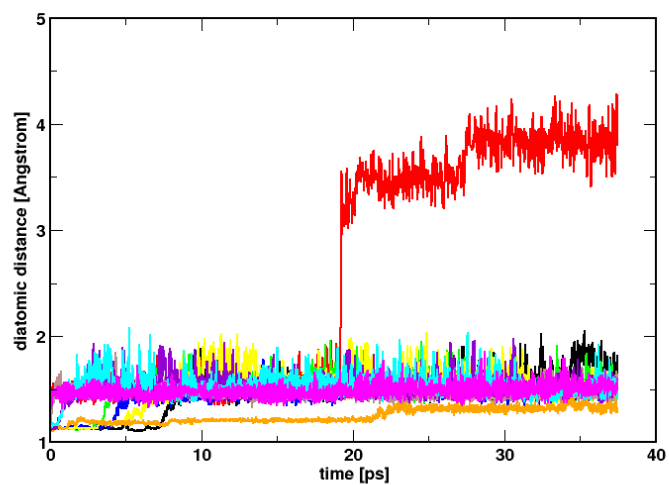

Figure S12: Diatomic distances of all nitrogen molecules in simulation 4 (300 K). A single nitrogen molecule dissociates.

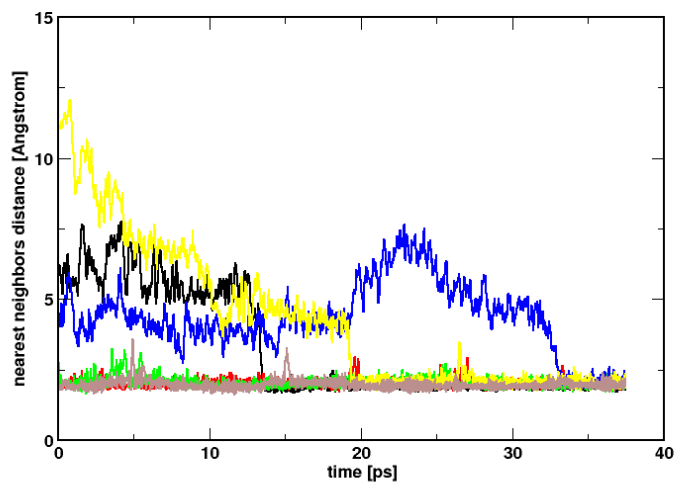

Figure S13: Simulation 4: Distances of the nearest neighbors, first nitrogen atom. In the end, the nitrogen atom is surrounded by six lithium atoms.

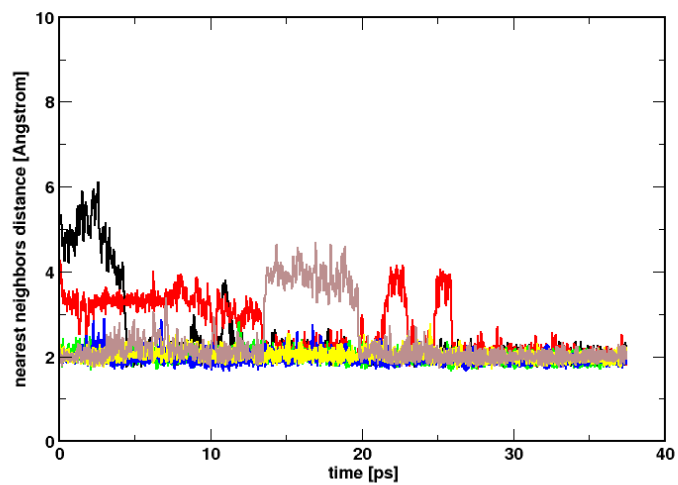

Figure S14: Simulation 4: Distances of the nearest neighbors, second nitrogen atom. In the end, the nitrogen atom is surrounded by six lithium atoms.

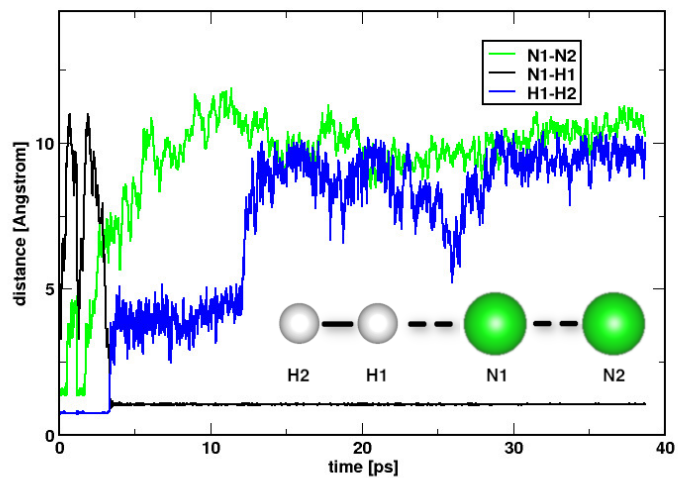

Figure S15: Simulation 11: Formation of the N-H bond, breaking of the N-N and H-H bonds.

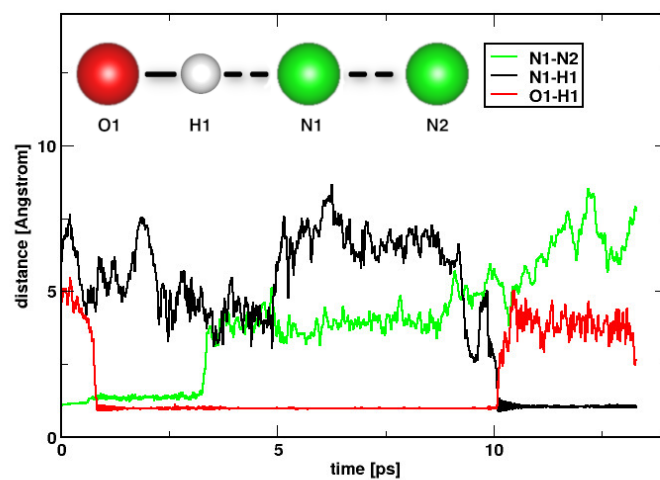

Figure S16: Simulation **20**: Formation of the N-H bond, breaking of the N-N and O-H bonds.

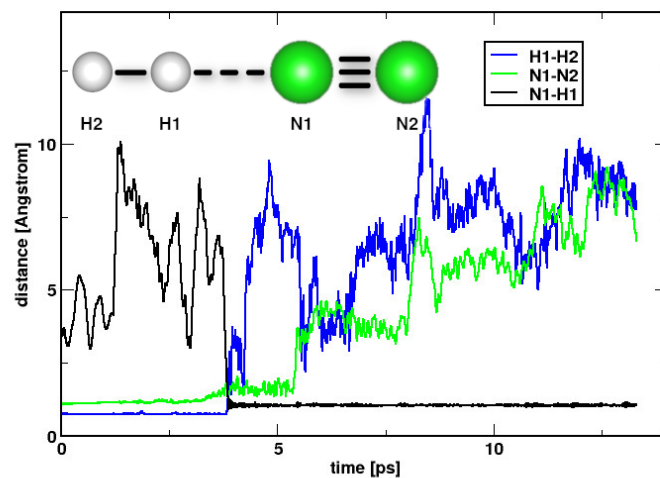

Figure S17: Simulation **24**: Formation of the N-H bond, breaking of the N-N and H-H bonds.
